# Supplementary material
Source: Springer Nature journal article supplement (https://www.springermedizin.de/resource/supplementary/12885_2011_3057_MOESM1_ESM.pdf/9464184)

A

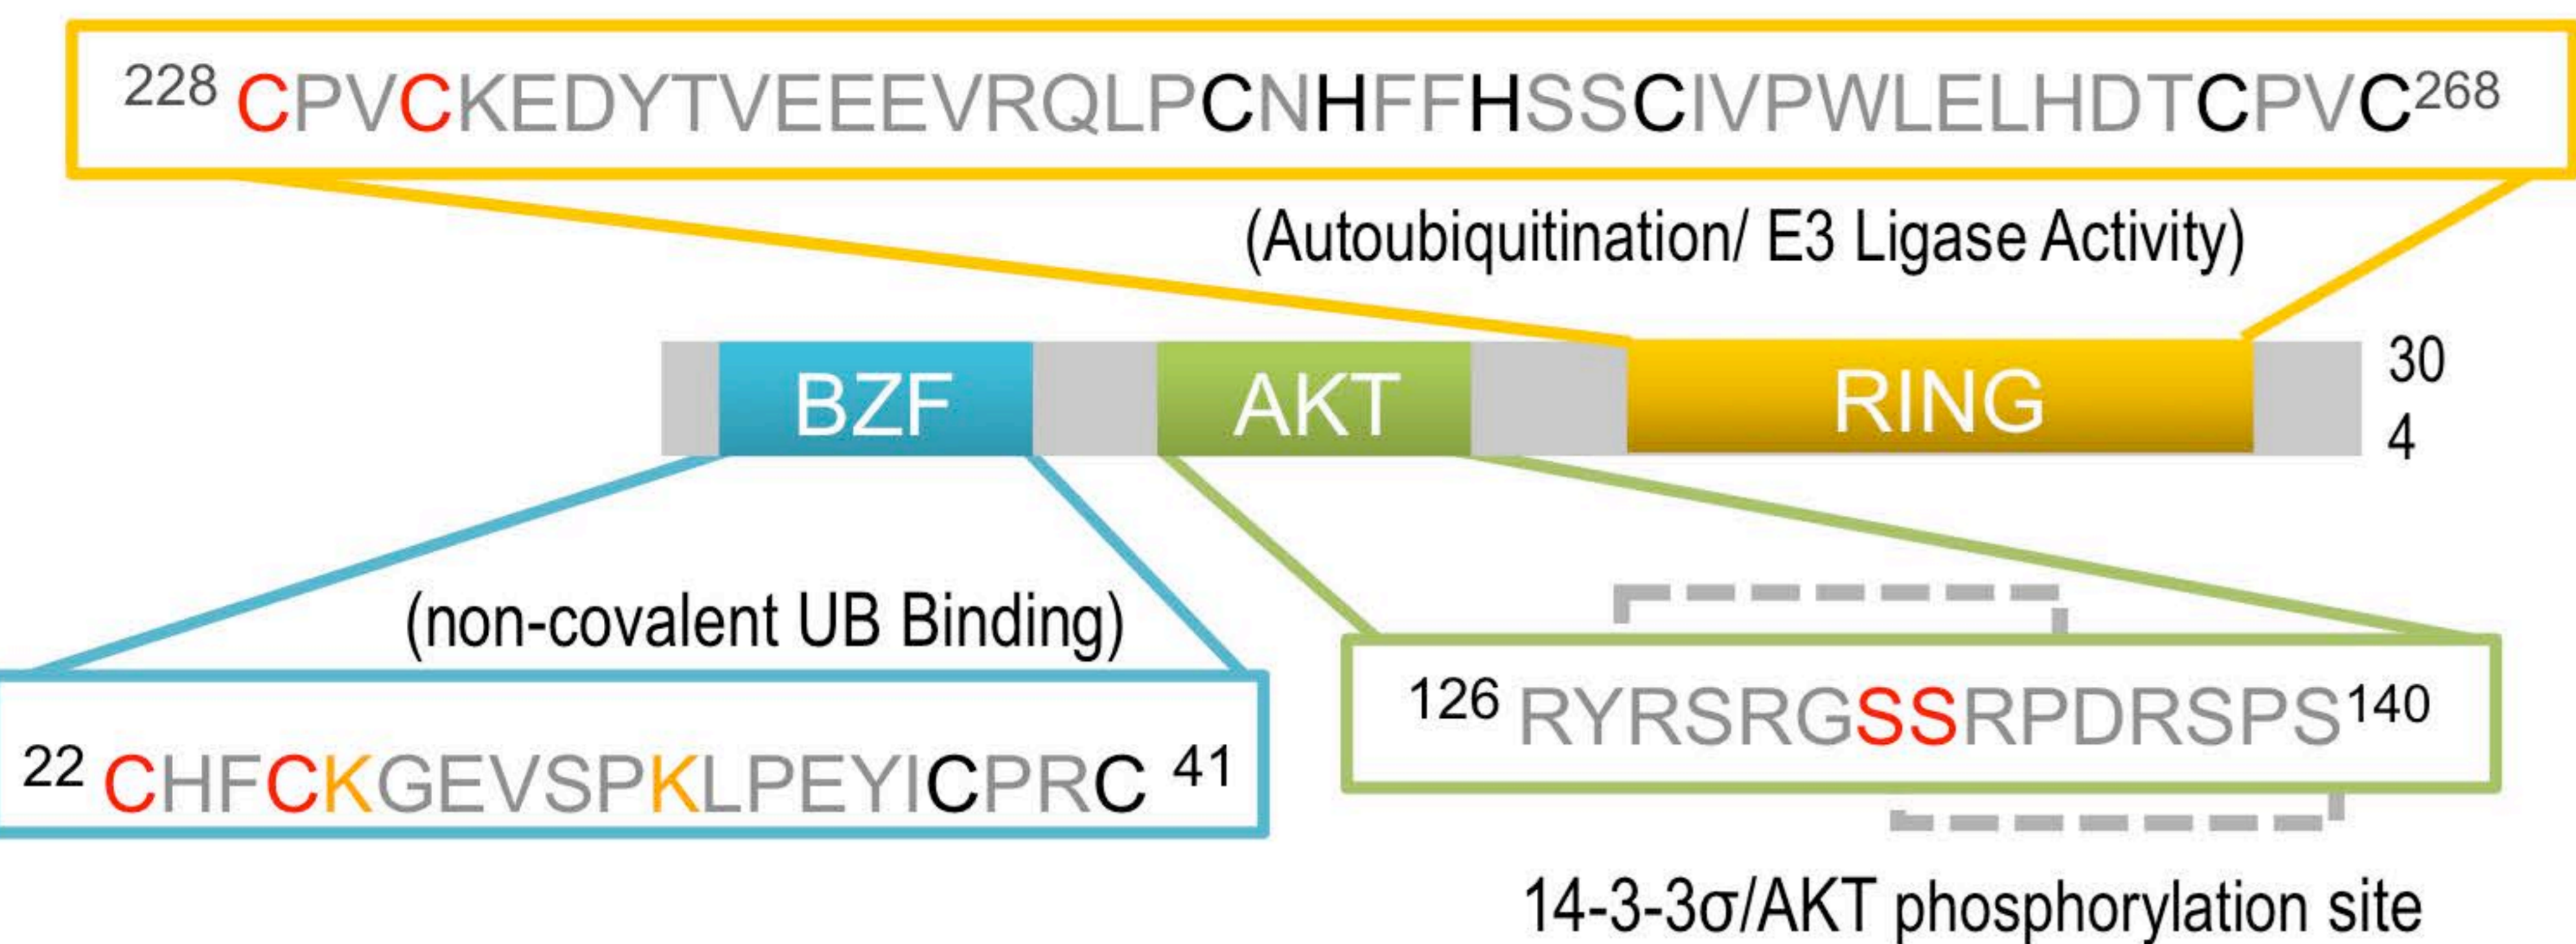

B

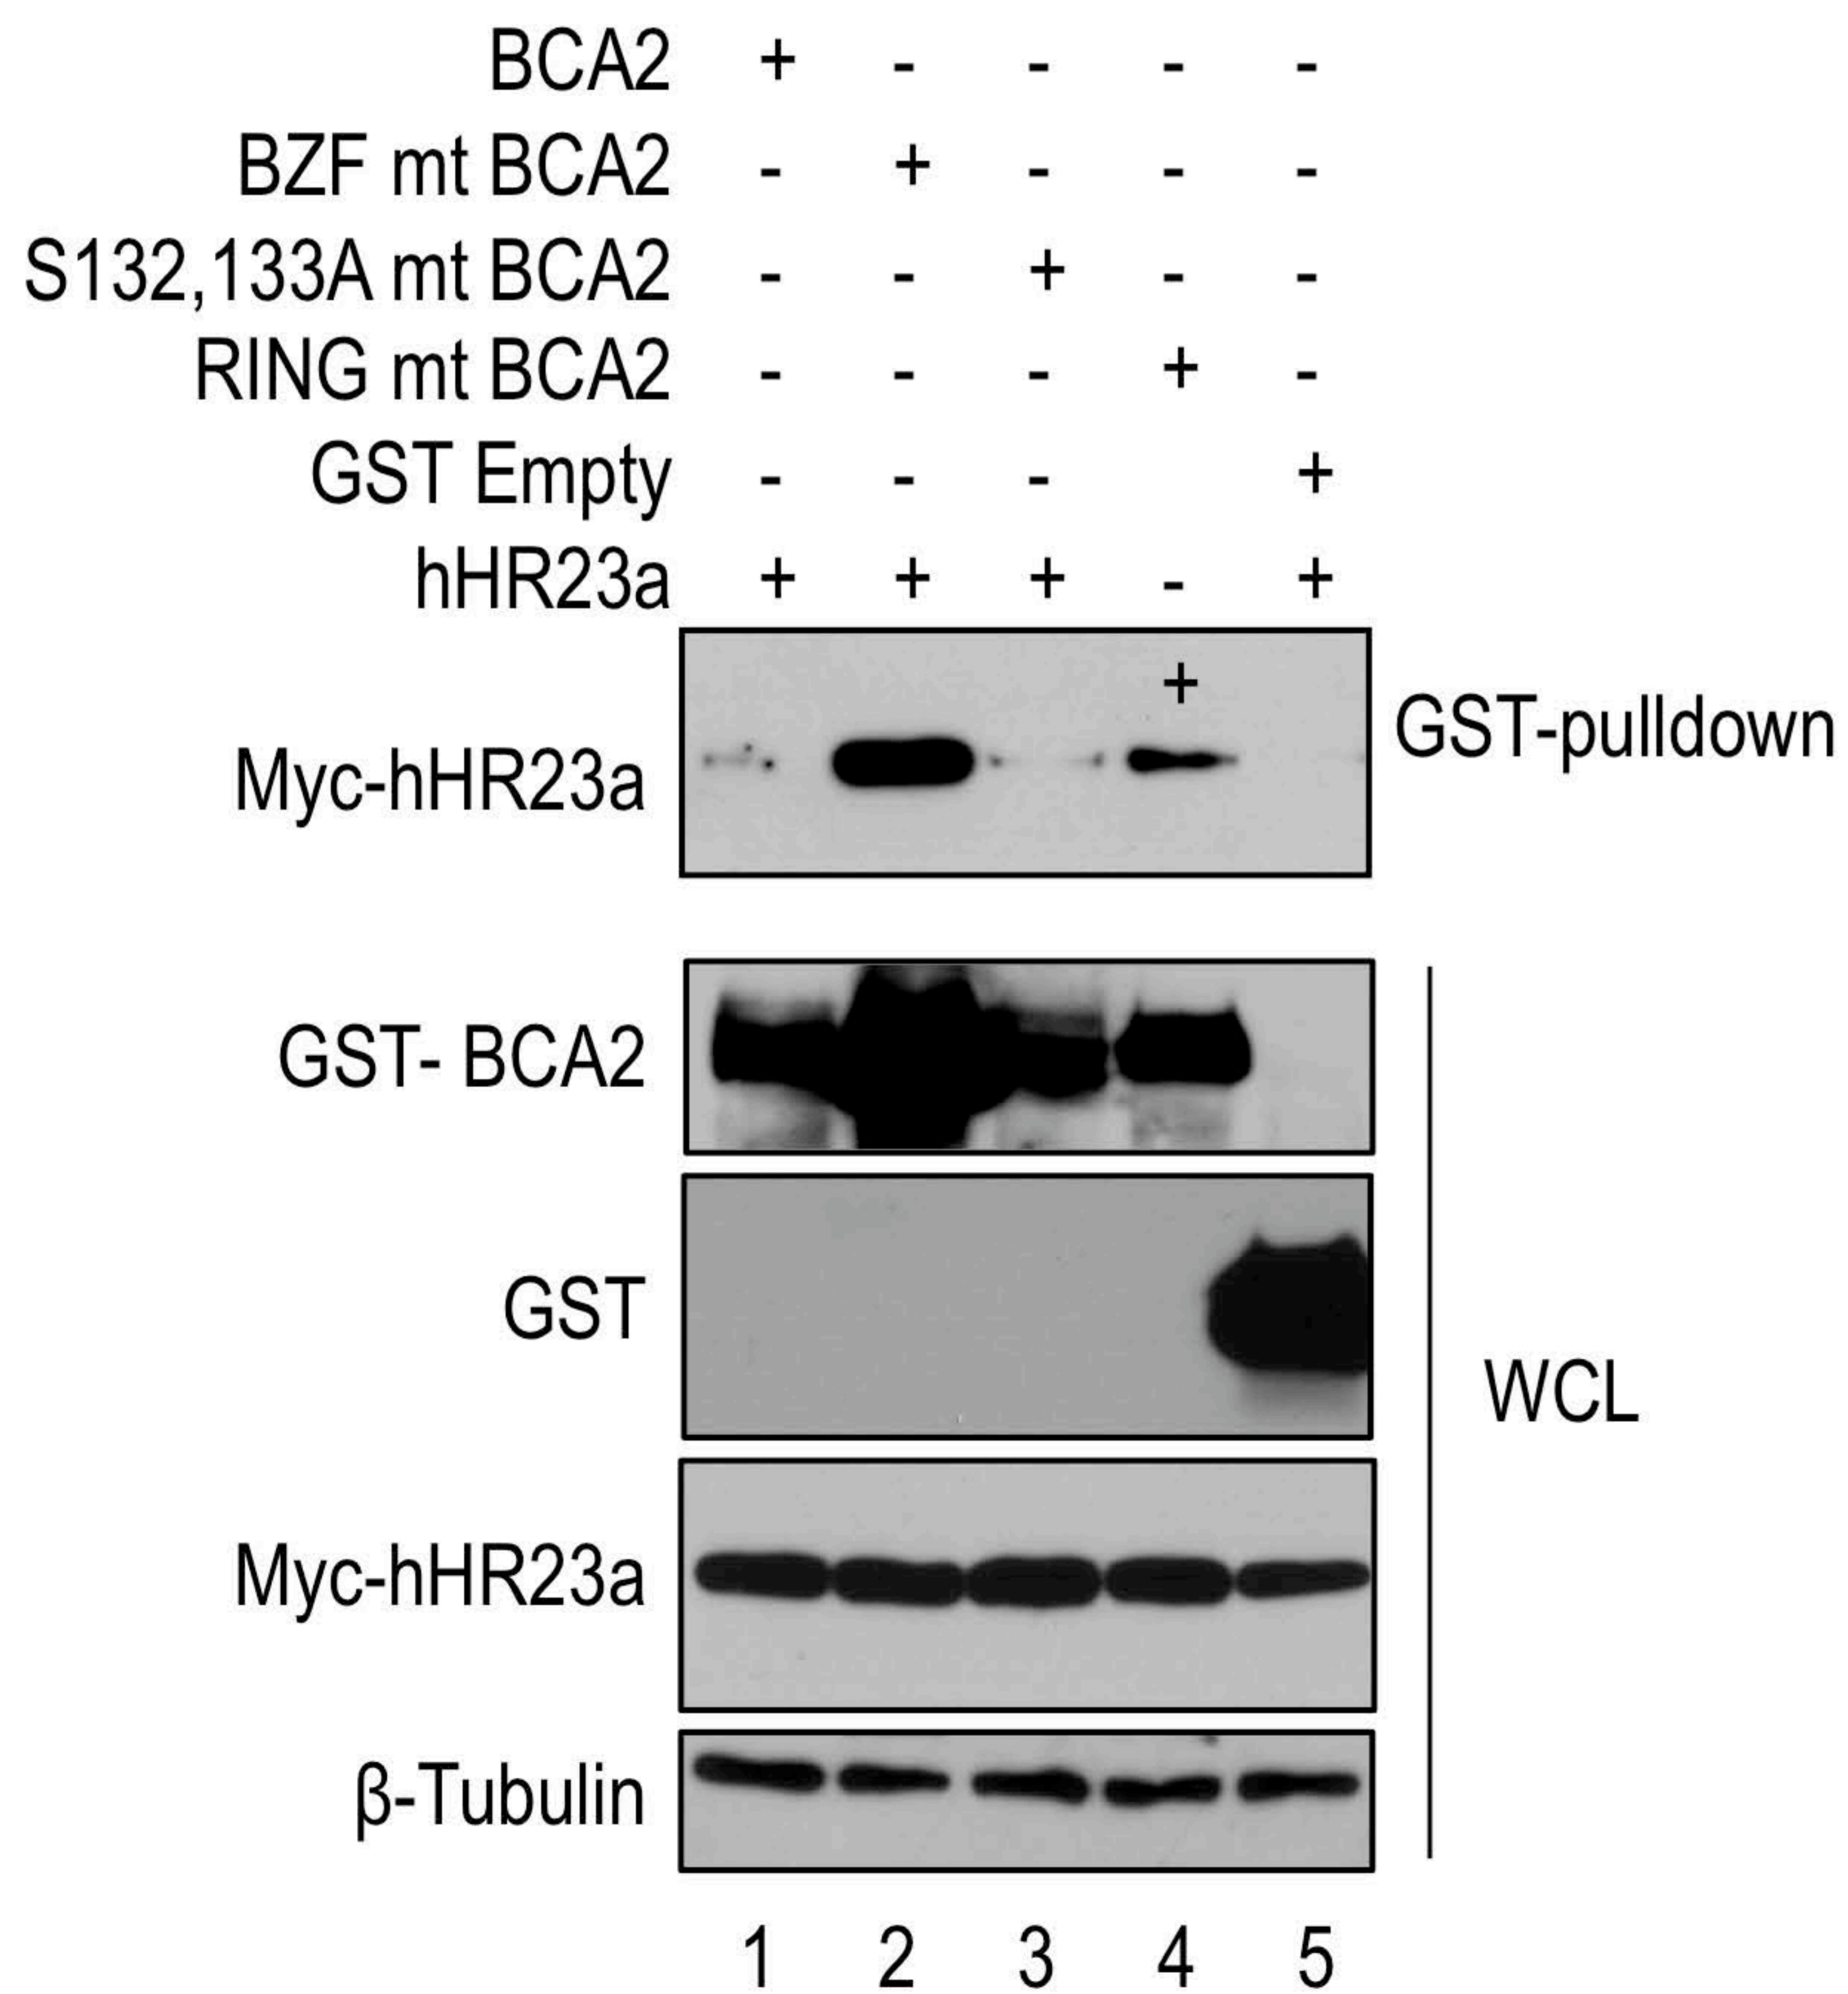

C

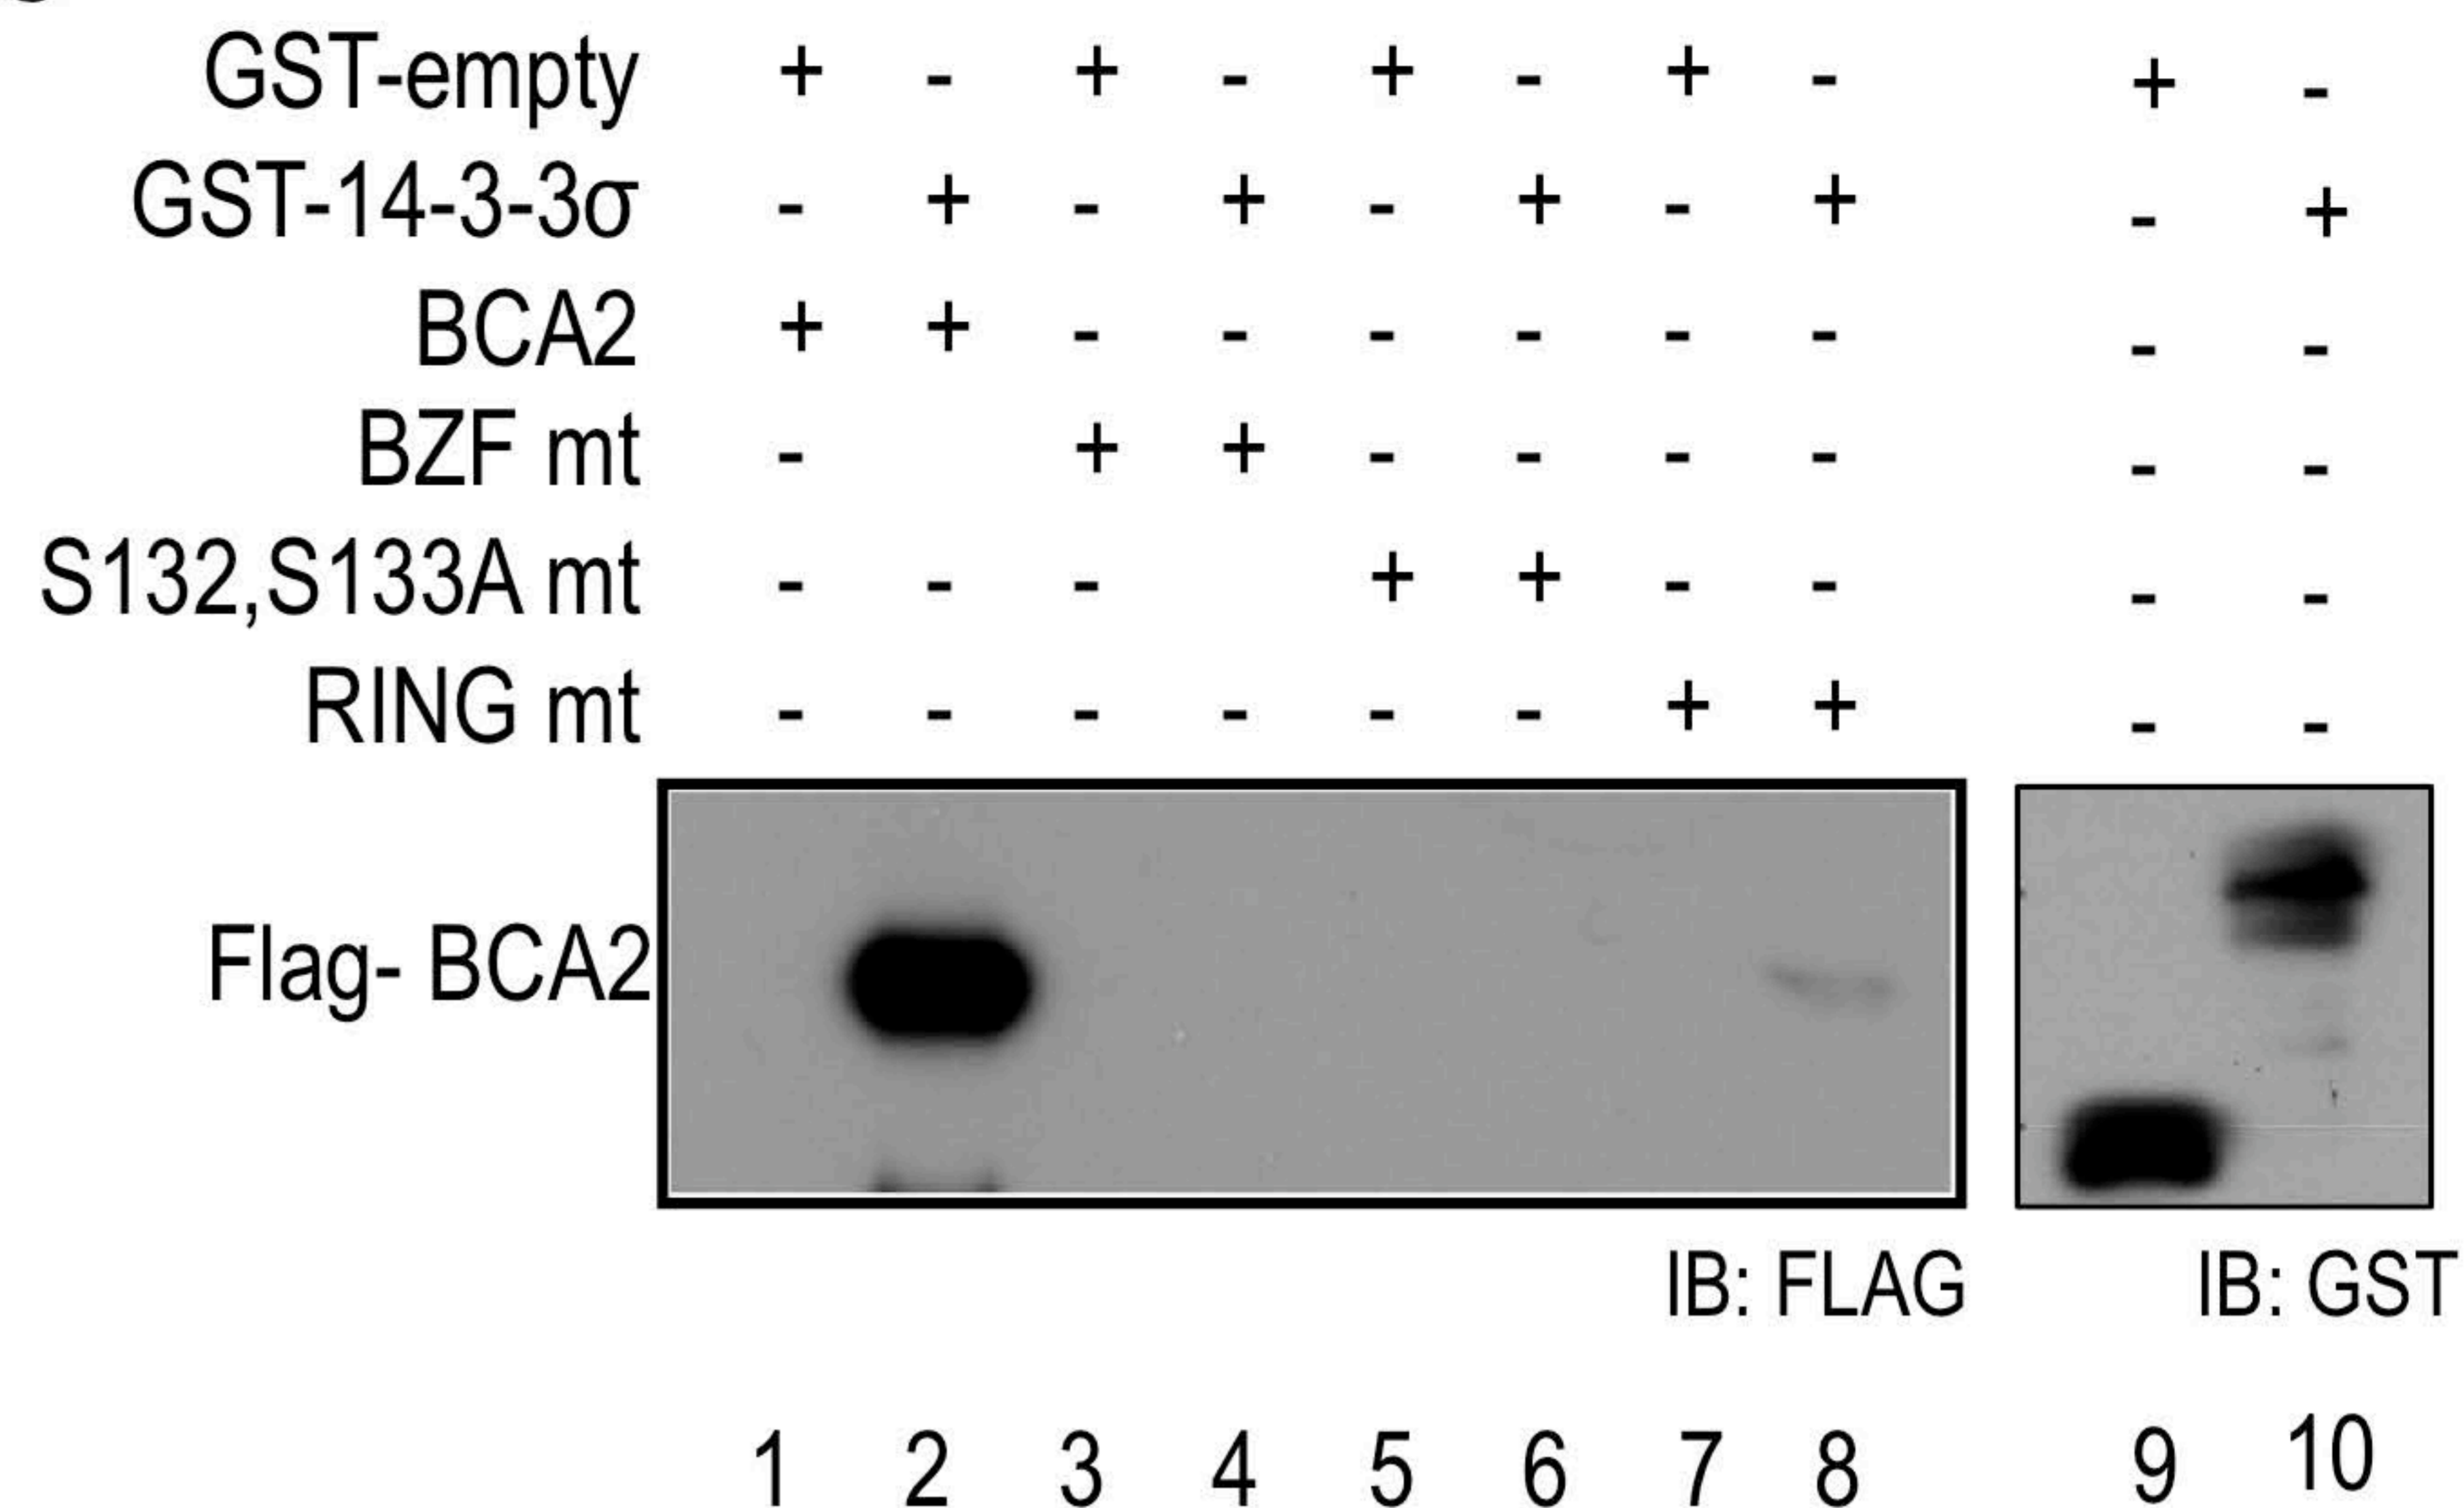

D

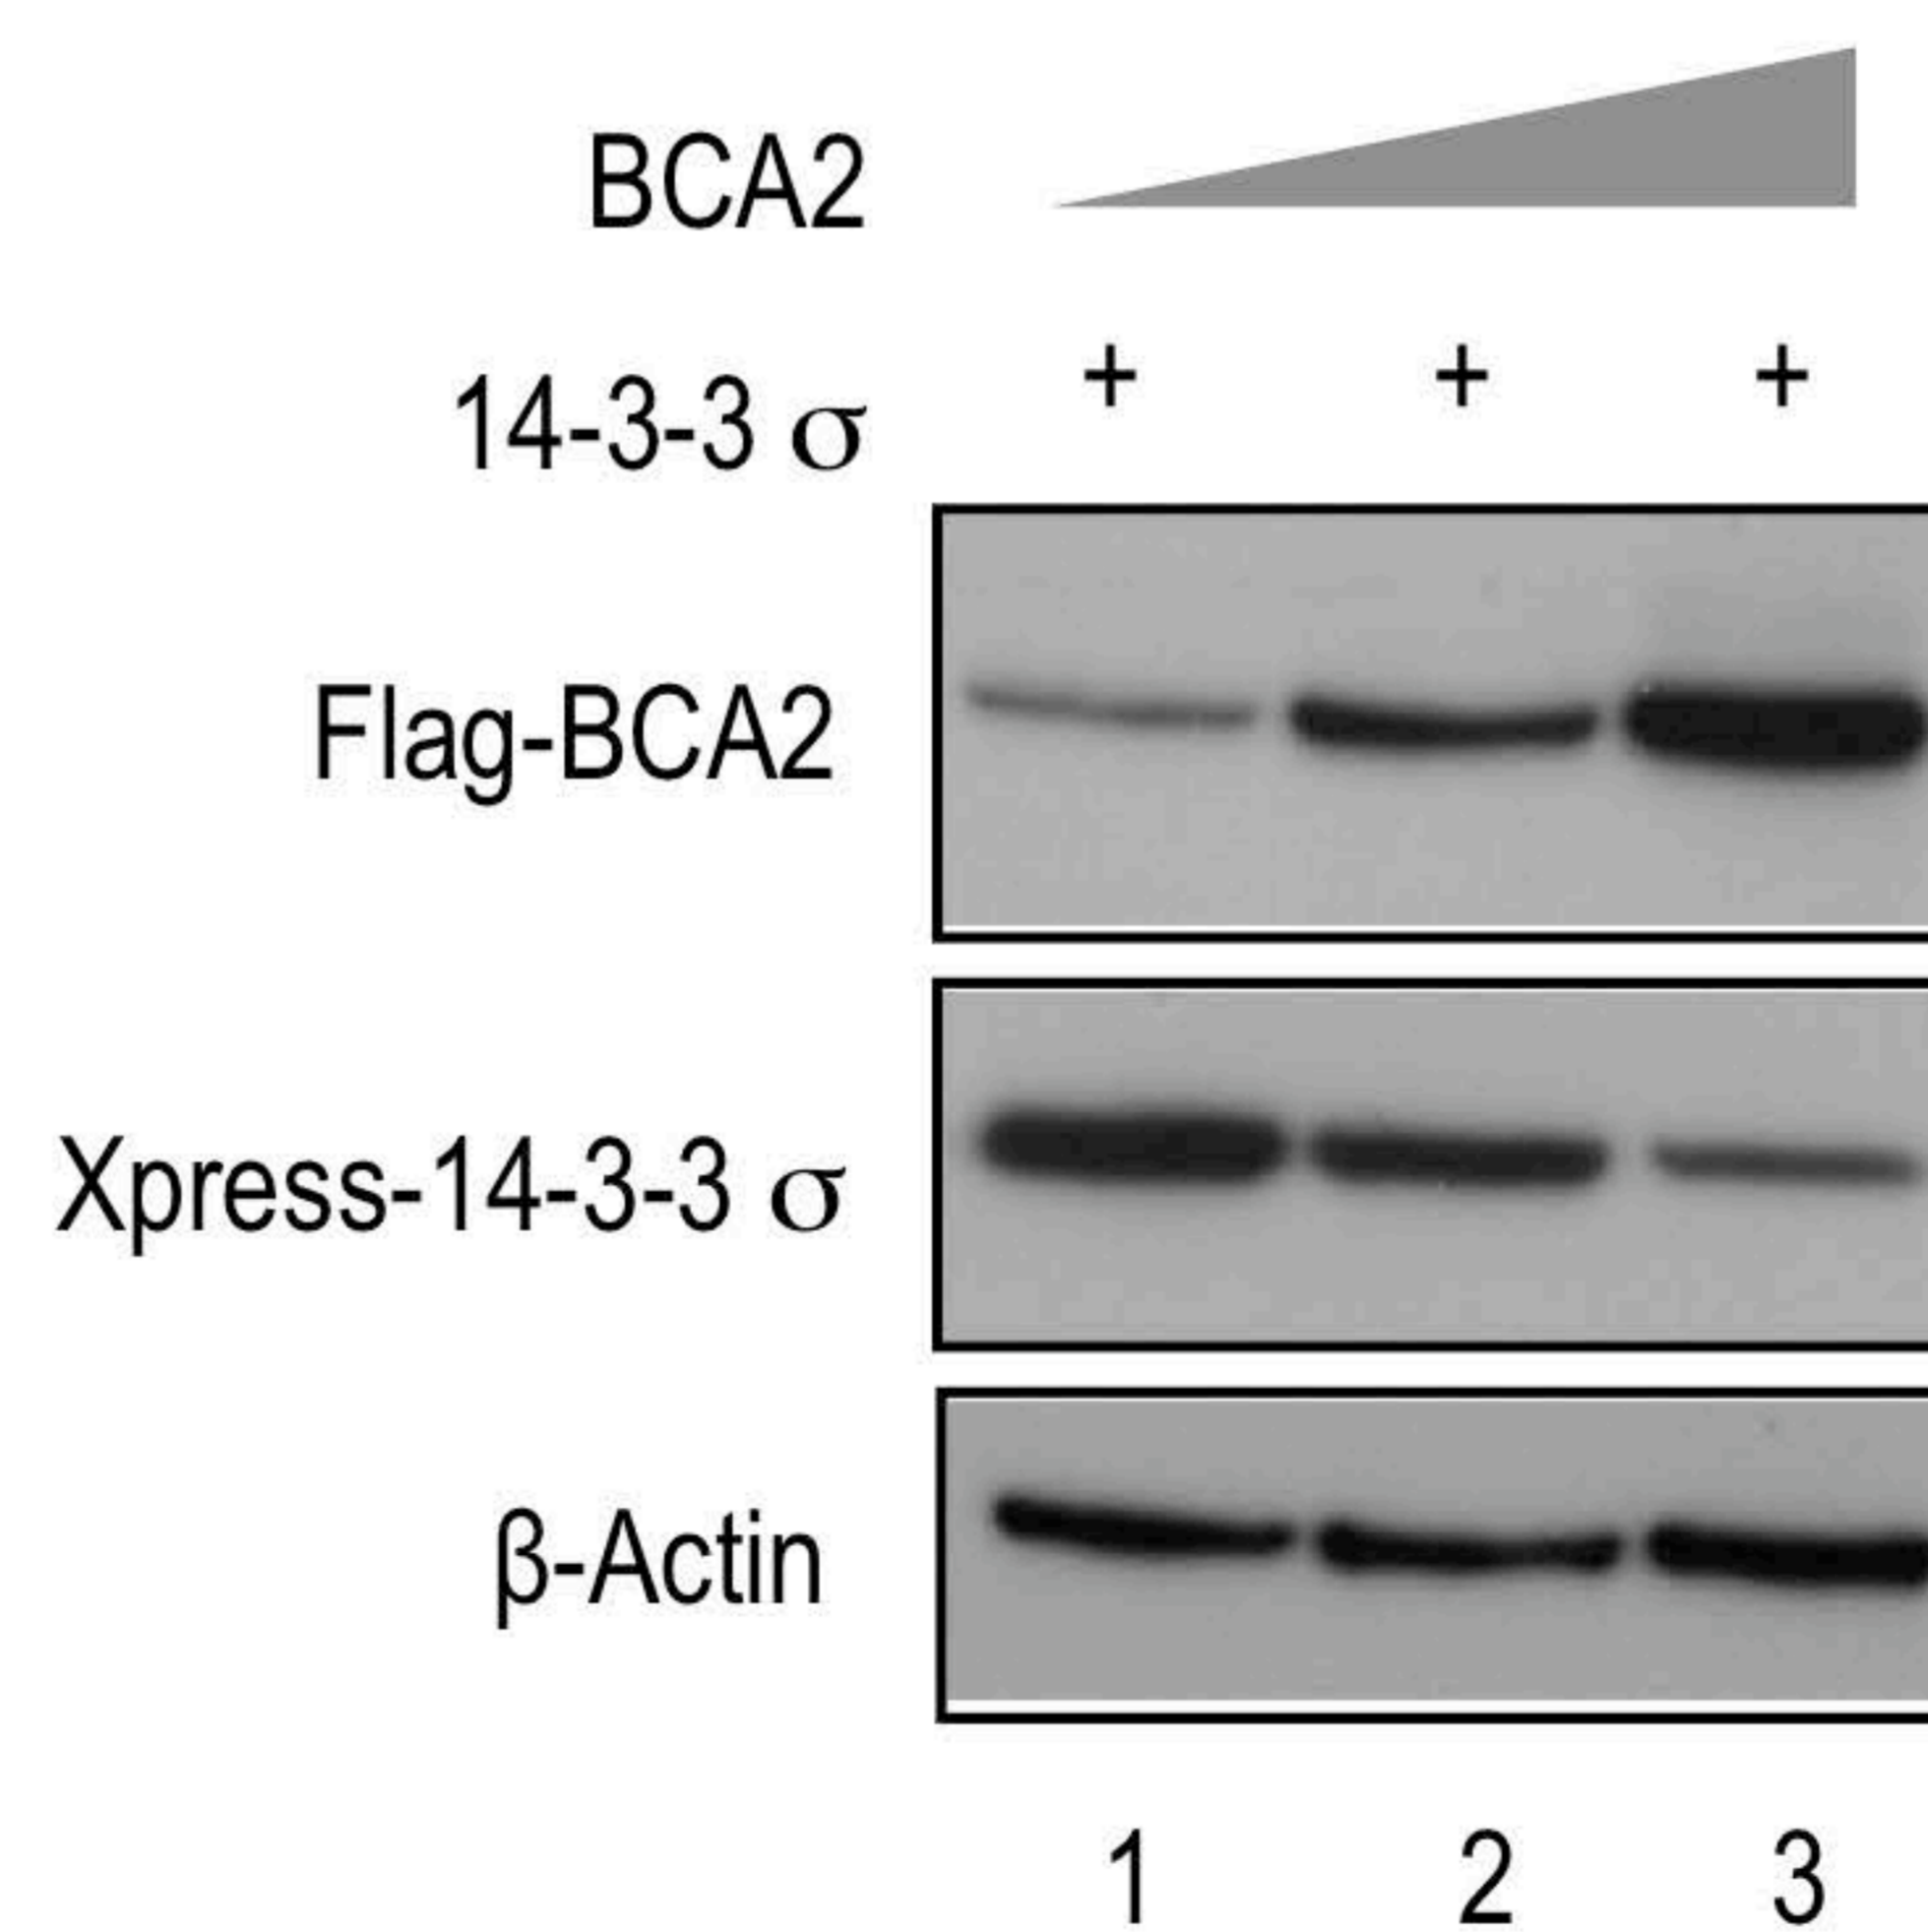

E

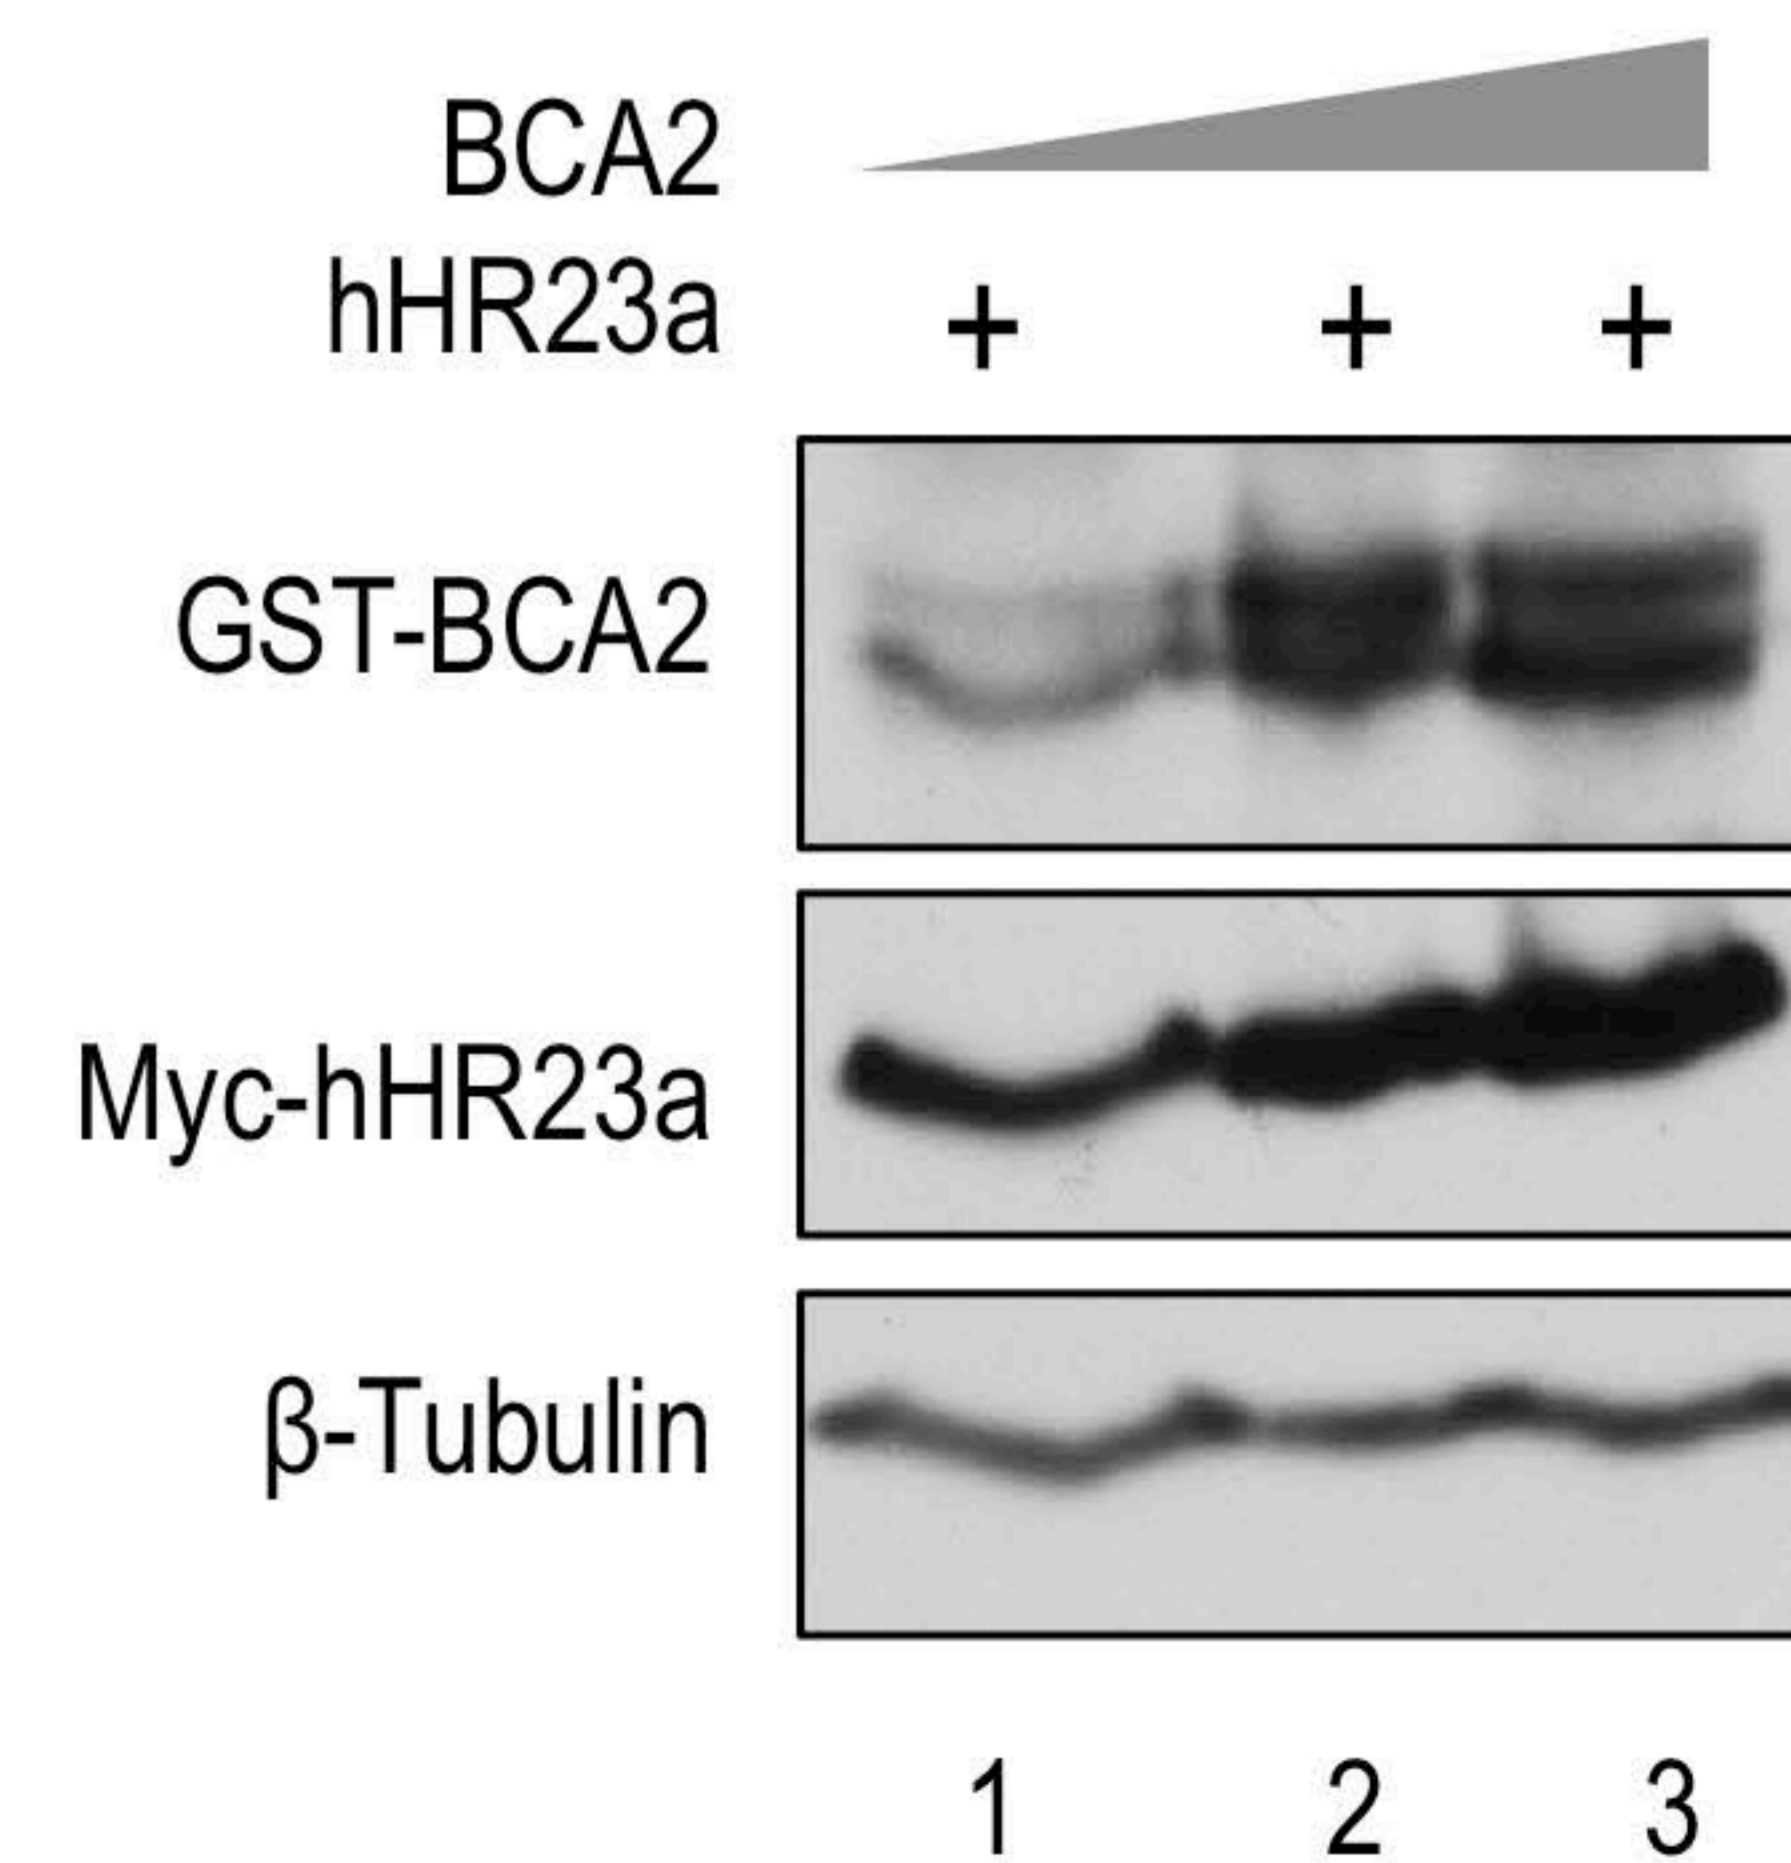

Supplement: MOESM1 [file 9464184]
